# Supplementary material for: Differential Nutrient Limitation of Soil Microbial Biomass and Metabolic Quotients (qCO2): Is There a Biological Stoichiometry of Soil Microbes?
Source: PubMed Central journal article supplement (PMC3602520; doi:10.1371/journal.pone.0057127), 2013-03-19

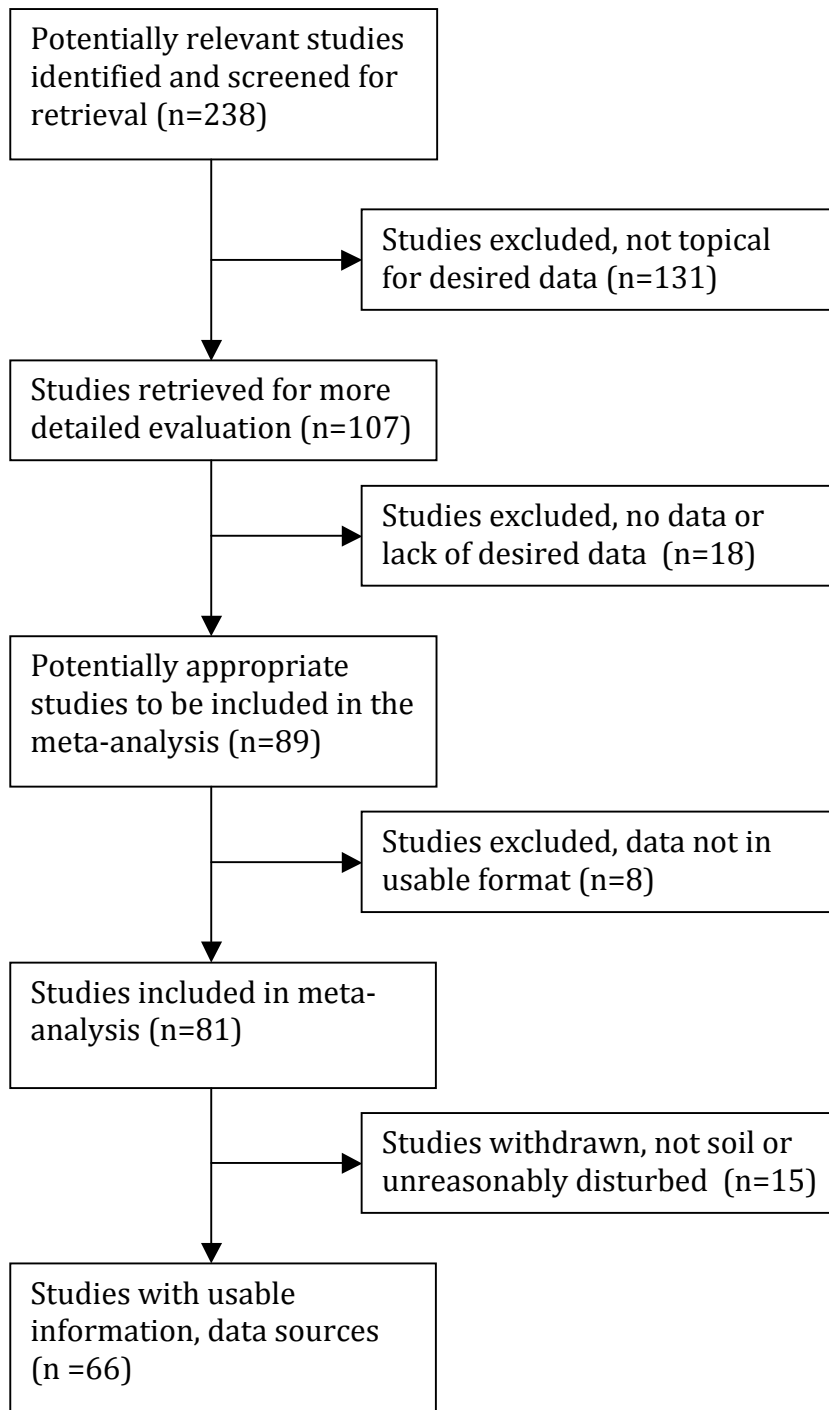

Supplement: pone.0057127.s005.pdf [file pone.0057127.s005.pdf]
